# Supplementary material for: Climbing the Research Ladder: A 25-year Analysis of K-to-R Grant Conversion among Plastic Surgeons
Source: PubMed Central journal article supplement — Plast Reconstr Surg Glob Open. 2024 Oct 11;12(10):e6233. doi: 10.1097/GOX.0000000000006233 (PMC11469810; doi:10.1097/gox.0000000000006233), 2024-10-11
Supplement: gox-12-e6233-s001.pdf [file gox-12-e6233-s001.pdf]

| Collected Characteristic                                                   | Unsuccessful Converters | Successful Converters | Total |
|----------------------------------------------------------------------------|-------------------------|-----------------------|-------|
| Gender - Male                                                              | 6                       | 7                     | 13    |
| Gender - Female                                                            | 3                       | 2                     | 5     |
| MBA                                                                        | 1                       | 0                     | 1     |
| MPH                                                                        | 0                       | 2                     | 2     |
| PhD                                                                        | 2                       | 1                     | 3     |
| Integrated Residency                                                       | 2                       | 3                     | 5     |
| Independent Residency                                                      | 7                       | 6                     | 13    |
| Completed a Research Fellowship                                            | 5                       | 7                     | 12    |
| Completed a Clinical Fellowship                                            | 5                       | 6                     | 11    |
| Assistant Professor                                                        | 2                       | 3                     | 5     |
| Associate Professor                                                        | 5                       | 4                     | 9     |
| Professor                                                                  | 2                       | 2                     | 4     |
| History of PSF Funding                                                     | 6                       | 4                     | 10    |
| Average Time Since Completion of Medical School (Years)                    | 21.0                    | 18.0                  | 19.5  |
| Average Time Since Completion of Residency (Years)                         | 13.6                    | 10.1                  | 11.8  |
| Average Total Years of Research Fellowship Training                        | 1.1                     | 1.4                   | 1.3   |
| Average Total Number of 1st Authorships                                    | 9                       | 19                    | 14    |
| Average Total Number of Publications                                       | 41                      | 76                    | 58    |
| Average Mean RCR                                                           | 1.5                     | 1.8                   | 1.7   |
| Average iCite Weighted RCR                                                 | 59.6                    | 142.0                 | 100.8 |
| Average Number of Disbursements Throughout K-Series                        | 5                       | 5                     | 5     |
| Average Non-Time-Adjusted Total Number of K-Series-Associated Publications | 9                       | 22                    | 16    |
| Average Non-Time-Adjusted Mean RCR of K-Series-Associated Publications     | 1.1                     | 2.5                   | 1.8   |
| Average Non-Time-                                                          | 13.1                    | 65.6                  | 39.4  |

|                                                                                  |      |      |      |
|----------------------------------------------------------------------------------|------|------|------|
| Adjusted RCR-<br>Weighted K-Series-<br>Associated Publications                   |      |      |      |
| Average Time-<br>Adjusted Total Number<br>of K-Series Associated<br>Publications | 7    | 14   | 10   |
| Average Time-<br>Adjusted Mean RCR of<br>K-Series-Associated<br>Publications*    | 1.0  | 1.9  | 1.4  |
| Average Time-<br>Adjusted RCR-<br>Weighted K-Series-<br>Associated Publications  | 10.0 | 32.3 | 21.1 |
